# Supplementary material for: Highly transparent all-perovskite luminescent solar concentrator/photovoltaic windows
Source: Royal Society of Chemistry journal article supplement (doi:10.1039/d4ta06249c), 2024-01-01
Supplement: d4ta06249c1.pdf [file d4ta06249c1.pdf]

## Electronic Supplementary Information

### **Highly transparent all-perovskite luminescent solar concentrator/photovoltaic windows**

Seungju Oh<sup>1,‡</sup>, Sang Woo Bae<sup>2,‡</sup>, Tae Hyung Kim<sup>2</sup>, Gumin Kang<sup>3</sup>, Heesuk Jung<sup>4</sup>, Young-Hoon Kim<sup>2\*</sup>, and Minwoo Park<sup>1\*</sup>

<sup>1</sup>Department of Chemical and Biological Engineering, Sookmyung Women's University, Seoul, 04310, Korea

<sup>2</sup>Energy Engineering, Hanyang University, Seoul, 04763, Korea

<sup>3</sup>Nanophotonics Research Center, Korea Institute of Science Technology (KIST), Seoul, 02792, Korea

<sup>4</sup>Advanced Photovoltaic Research Center, Korea Institute of Science Technology (KIST), Seoul, 02792, Korea

‡These authors contributed equally to this work.

\*Corresponding author e-mails: [younghoonkim@hanyang.ac.kr](mailto:younghoonkim@hanyang.ac.kr), [mwpark@sm.ac.kr](mailto:mwpark@sm.ac.kr)

## S1. Calculation of photodetector parameters

Responsivity ( $R$ ), specific detectivity ( $D^*$ ), and noise equivalent power ( $NEP$ ) of the Mn:CsPbCl<sub>3</sub>-3/PS LSC/PV-based photodetectors were calculated by the following equations:<sup>1,2</sup>

$$R = \frac{I_{on} - I_{dark}}{PA_{top}} \quad (1)$$

$$D^* = \frac{RA_{top}^{1/2}}{(2eI_{dark})^{1/2}} \quad (2)$$

$$NEP = \frac{A_{top}^{1/2}}{D^*} \quad (3)$$

where  $I_{on}$  and  $I_{dark}$  are the on and off-current of the PSCs, respectively,  $P$  is the power of incident UV light,  $A_{top}$  is the top-area of the LSCs, and  $e$  is the elementary charge.

[1] Z. Cheng, K. Liu, J. Yang, X. Chen, X. Xie, B. Li, Z. Zhang, L. Liu, C. Shan, D. Shen, *ACS Appl. Mater. Interfaces*, 2019, **11**, 34144-34150.

[2] H. Oh, H. J. Kim, S. Kim, J. A Kim, G. Kang, M. Park, *Appl. Surf. Sci.*, 2021, **544**, 148850.

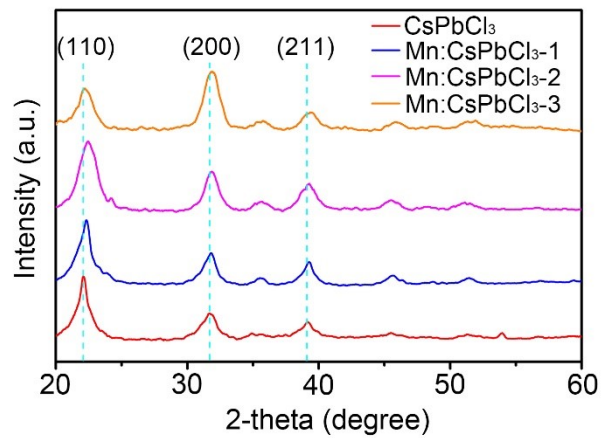

**Figure S1.** XRD patterns of the CsPbCl<sub>3</sub>, Mn:CsPbCl<sub>3</sub>-1, Mn:CsPbCl<sub>3</sub>-2, and Mn:CsPbCl<sub>3</sub>-3 NC films.

**Table S1.** Time-resolved photoluminescence (TRPL) parameters for the Mn:CsPbCl<sub>3</sub> and Mn:CsPbCl<sub>3</sub>-3/PS deposited onto glass substrates fitted using a bi-exponential decay function.<sup>a)</sup>

| LSC                          | a <sub>1</sub> | τ <sub>1</sub> [ms] | a <sub>2</sub> | τ <sub>2</sub> [ms] | τ <sub>avg</sub> [ms] <sup>b)</sup> |
|------------------------------|----------------|---------------------|----------------|---------------------|-------------------------------------|
| Mn:CsPbCl <sub>3</sub>       | 0.569          | 0.185               | 0.431          | 3.289               | 1.523                               |
| Mn:CsPbCl <sub>3</sub> -3/PS | 0.493          | 0.374               | 0.507          | 4.462               | 2.447                               |

a) Fit function =  $a_1 e^{-t/\tau_1} + a_2 e^{-t/\tau_2}$

b)  $\tau_{avg} = \left( \frac{\sum_i a_i \tau_i}{\sum_i a_i} \right)$ , where  $\sum_i a_i = 1$

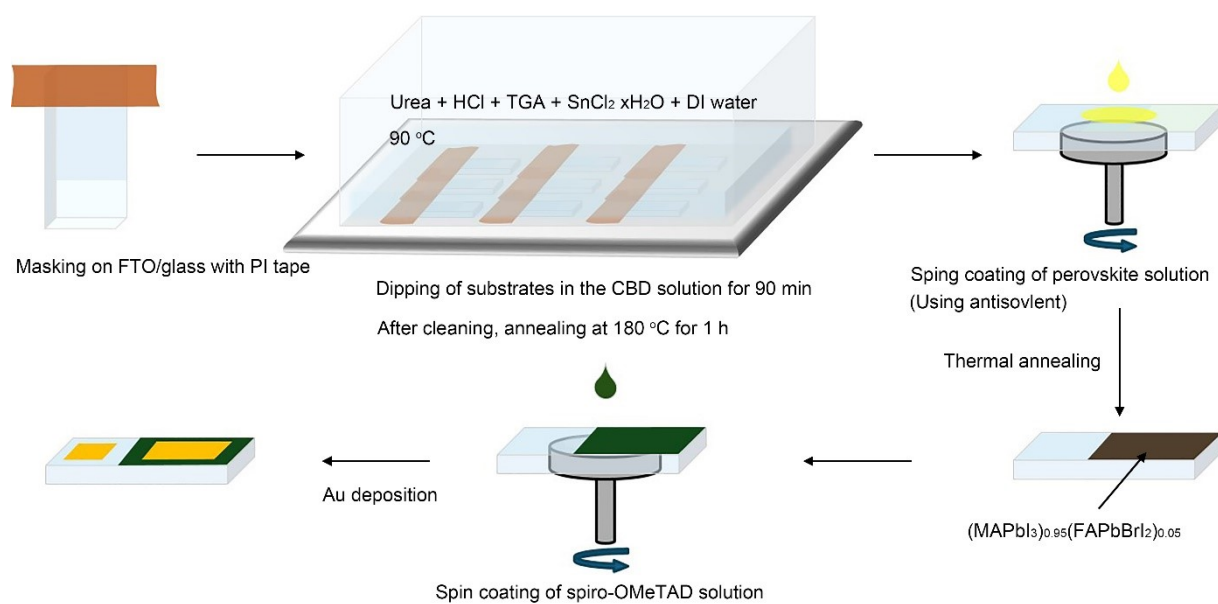

**Figure S2.** Schematic illustrating the overall process employed to fabricate the n-*i*-p structured PSCs.

**Table S2.** Parameters of the series-connected PSCs.<sup>1)</sup>

| Number of cells | $V_{oc}$<br>[V] | $J_{sc}$<br>[mA cm <sup>-2</sup> ] | FF    | PCE<br>[%] |
|-----------------|-----------------|------------------------------------|-------|------------|
| 1               | 1.14            | 23.87                              | 0.774 | 21.06      |
| 4               | 4.55            | 5.944                              | 0.772 | 20.88      |
| 8               | 9.07            | 2.964                              | 0.769 | 20.67      |
| 16              | 18.1            | 1.48                               | 0.765 | 20.49      |

1) The values were measured under a standard AM 1.5G illumination of 100 mW cm<sup>-2</sup>.

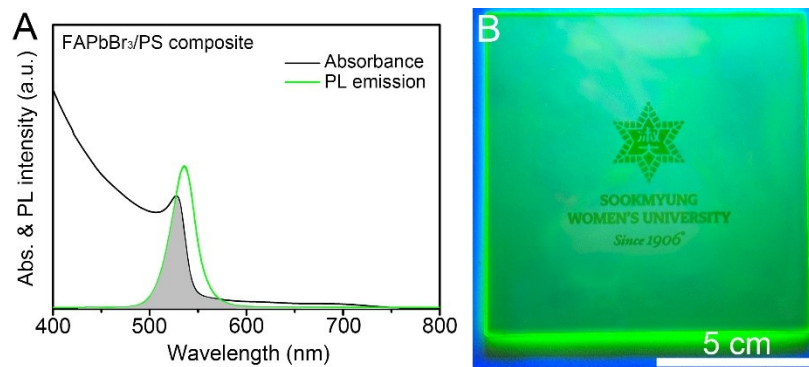

**Figure S3.** (A) UV-visible absorption and PL emission spectra of the FAPbBr<sub>3</sub>/PS LSC. The absorption-emission spectral overlap area is indicated in dark gray. (B) Photographic image of the FAPbBr<sub>3</sub>/PS LSC under UV light illumination at  $\lambda = 365$  nm (LSC size =  $10 \times 10$  cm).

**Table S3.** Comparison of recently reported optical efficiencies of PeLSCs coupled with Si solar cells.

| LSC materials                                                                  | Geometric factor | Optical efficiency [%] | Ref. |
|--------------------------------------------------------------------------------|------------------|------------------------|------|
| CsPb(Br <sub>0.25</sub> I <sub>0.75</sub> ) <sub>3</sub> -PMMA                 | 12.5             | 5.88                   | S1   |
| MAPbBr <sub>3</sub> /PVP nanofibers                                            | 11.06            | 3.62                   | S2   |
| Au-doped MAPbBr <sub>3</sub> NCs/PMMA                                          | 10               | 1.36                   | S3   |
| PEA <sub>2</sub> MnBr <sub>2</sub> I <sub>2</sub>                              | 25               | 1.57                   | S4   |
| Bi-doped Cs <sub>2</sub> Na <sub>0.6</sub> Ag <sub>0.4</sub> InCl <sub>6</sub> | 10               | 2.57                   | S5   |
| Quasi 2D PEA <sub>2</sub> MA <sub>x-1</sub> Pb <sub>x</sub> Br <sub>3x+1</sub> | 12.5             | 4.9                    | S6   |
| CsPbBr <sub>3</sub> NCs                                                        | 20.8             | 2.1                    | S7   |

(S1) H. Guo, P. Xia, S. Huang, H. Sun, C. Lu, C. Liang, X. Zhou, S. Xu, C. Wang, *Adv. Funct. Mater.*, 2024, 2409232 doi.org/10.1002/adfm.202409232

(S2) H. Oh, G. Kang, M. Park, *ACS Appl. Energy Mater.*, 2022, **5**, 15844-15855.

(S3) E. Bagherzadeh-Khajehmarjan, S. M. Shakouri, A. Nikniazi, S. Ahmadi-Kandjani, *Org. Electron.*, 2022, **109**, 106629.

(S4) P. Xia, Y. Duan, X. Hu, C. Lu, S. Xu, C. Wang, *J. Energy Chem.*, 2023, **78**, 188-194

(S5) S. Li, Y. Zhang, Z. song, Z. Zheng, X. Zhang, X. Liu, *J. Mater. Chem. C*, 2024, **12**, 10096-10103.

(S6) X. -F. Liu, B. Sun, X. -Y. Li, Y. Huo, C. Zhang, H. -L. Zhang, *J. Mater. Chem. C*, 2024, **12**, 16627-16635.

(S7) Y. Zhang, W. Zhang, Y. Ye, K. Li, C. Liu, *Sol. Energy Mater. Sol. Cells*, 2022, **238**, 111619.



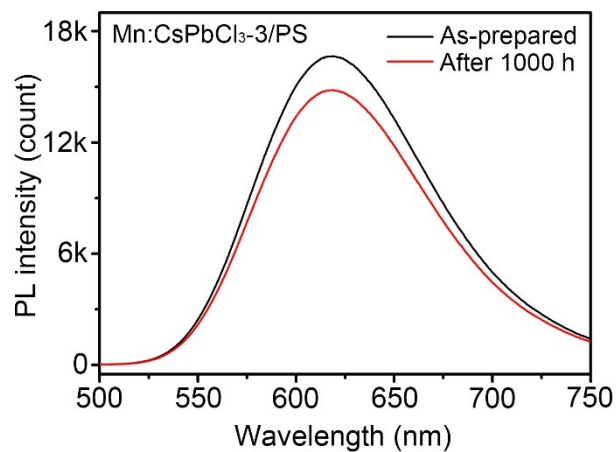

**Figure S4.** Steady-state PL spectra of the as-prepared Mn:CsPbCl<sub>3</sub>-3/PS LSC and Mn:CsPbCl<sub>3</sub>-3/PS LSC exposed to 1 sun illumination for 1000 h (RH = 10% and 25 °C).
